# Supplementary material for: Group-Based Lifestyle Intervention Strategies for Metabolic Syndrome: A Scoping Review and Strategic Framework for Future Research
Source: MDPI journal article supplement (doi:10.3390/medicina57111169), 2021-10-28
Supplement: s1 [file s1]

**Table S2.** Summary of the studies conducted among the population with metabolic syndrome ( $n = 7$ ).

|   | Study /<br>Country /<br>Design                        | Participants                                                                | Age (years)                                                               | MetS<br>criteria | Intervention provider<br>/ Setting                                                                                     | Study<br>duration<br>(months) | Intervention                                                                                                                                                                                                                                                                                                                                                                                                    | Main findings                                                                                                                                                                                                                                                                                                                                           |
|---|-------------------------------------------------------|-----------------------------------------------------------------------------|---------------------------------------------------------------------------|------------------|------------------------------------------------------------------------------------------------------------------------|-------------------------------|-----------------------------------------------------------------------------------------------------------------------------------------------------------------------------------------------------------------------------------------------------------------------------------------------------------------------------------------------------------------------------------------------------------------|---------------------------------------------------------------------------------------------------------------------------------------------------------------------------------------------------------------------------------------------------------------------------------------------------------------------------------------------------------|
| 1 | Bo et al. [16]<br><br>Italy<br>RCT                    | 335 adults<br><br><i>169 intervention</i><br><i>166 control</i>             | Intervention:<br>M=55.7<br>(SD=5.7)<br><br>Control:<br>M=55.7<br>(SD=5.6) | NCEP<br>ATP III  | Multidisciplinary team<br><br>Primary / community<br>clinic                                                            | 12                            | Lifestyle intervention (diet and physical<br>activity) program (5 sessions) with<br>team-based approach and interactive<br>group sessions.<br><br><i>Control: Standard counselling</i>                                                                                                                                                                                                                          | Significant reduction in prevalence of<br>MetS, central obesity,<br>hypertriglyceridemia and incidence<br>of diabetes in intervention group at<br>12 months.                                                                                                                                                                                            |
| 2 | Ma et al.<br>[17,18]<br><br>United States<br>RCT      | 241 adults<br><br><i>79 coach-led</i><br><i>81 DVD</i><br><i>81 control</i> | M=52.9<br>(SD=10.6)                                                       | IDF              | Multidisciplinary team<br>(Registered dietitian,<br>fitness instructor,<br>lifestyle coach)<br><br>Primary care clinic | 3                             | An adapted, 12-session DPP lifestyle<br>intervention curriculum, Group<br>Lifestyle Balance (GLB) <sup>TM</sup> . The program<br>was delivered face-to-face in 12 weekly<br>highly interactive classes to coach-led<br>intervention participants, or via a<br>home-based DVD.<br><br>Theory: Social Cognitive Theory and<br>the Transtheoretical Model of<br>Behaviour Change<br><br><i>Control: Usual care</i> | Greatest reduction in BMI seen in<br>coach-led group. 35.9% participants<br>in coach-led group achieved the 7%<br>DPP-based weight loss. Coach-led<br>and DVD groups achieved greater<br>net improvement in WC and FBG.                                                                                                                                 |
| 3 | Pettman et al.<br>[19,20]<br><br>Australia<br>RCT     | 153 obese adults<br><br><i>103 intervention</i><br><i>50 control</i>        | M=45                                                                      | IDF              | Study coordinator<br>with nutrition<br>background, peer<br>leader<br><br>Community                                     | 4                             | “Shape Up for Life” - structured but<br>non-prescriptive lifestyle education<br>program that was based on the<br>Australian national diet and physical<br>activity guidelines, developed based on<br>Stanford’s Chronic Disease Self-<br>Management Program (CDSMP).<br><br>Theory: Self-efficacy theory<br><br><i>Control: Usual care</i>                                                                      | Greater improvements in body<br>composition (weight, BMI, body fat<br>mass & percentage, abdominal fat<br>mass, WC), blood pressure (SBP,<br>DBP, mean arterial BP), total<br>cholesterol, LDL-C, physical work<br>capacity, handgrip strength and<br>dietary glycaemic index in<br>intervention group.<br><br>Program recorded high retention<br>rate. |
| 4 | Greer et al.<br>[26]<br><br>United States<br>Pre-post | 22 uninsured<br>adult patients                                              | Osceola<br>Clinic group:<br>M=57.3<br><br>Sumter                          | NCEP<br>ATP III  | Physician<br><br>Community clinics                                                                                     | 10 weeks                      | Cooperative Health Care Clinics<br>(CHCC) module (Lifestyle, Exercise,<br>Attitude, Relationships, and Nutrition<br>(LEARN) Program for Weight Control<br>curriculum) - a weight management<br>program utilizing a therapeutic lifestyle                                                                                                                                                                        | Significant improvement in WC and<br>knowledge base.<br><br>High patient satisfaction score.                                                                                                                                                                                                                                                            |

|   |                                                        |                                                                                                          |                            |                 |                                                                                                  |   |                                                                                                                                                                                                                                                                                                                                                                |                                                                                                                                                                                                          |
|---|--------------------------------------------------------|----------------------------------------------------------------------------------------------------------|----------------------------|-----------------|--------------------------------------------------------------------------------------------------|---|----------------------------------------------------------------------------------------------------------------------------------------------------------------------------------------------------------------------------------------------------------------------------------------------------------------------------------------------------------------|----------------------------------------------------------------------------------------------------------------------------------------------------------------------------------------------------------|
|   |                                                        |                                                                                                          | County<br>group:<br>M=54.2 |                 |                                                                                                  |   | change approach, addressing nutrition, physical activity, lifestyle changes, goal setting, recording, and helpful devices to achieve goals in an interactive format.<br>Facilitated group discussions and peer learning were encouraged during and after the presentation. Patients were encouraged to share their experiences and problem-solving strategies. |                                                                                                                                                                                                          |
| 5 | Shahar et al.<br>[21,22]<br><br>Malaysia<br>RCT        | 47 older adults<br>of Malay<br>ethnicity<br><br><i>24 intervention</i><br><i>23 control</i>              | M=66.5<br>(SD=4.3)         | NCEP<br>ATP III | Dietitian<br><br>Community                                                                       | 6 | Nutrition education via group counselling sessions, talks, and cooking and exercise demonstrations using a specifically developed healthy aging package.<br><br><i>Control: Standard care</i>                                                                                                                                                                  | Improvements in WC in older women and total cholesterol levels in older men were seen in the intervention group.                                                                                         |
| 6 | Chang et al.<br>[23]<br><br>Taiwan<br>RCT              | 131<br>metabolically<br>abnormal obese<br>individuals<br><br><i>65 intervention</i><br><i>66 control</i> | M=55.2<br>(SD=14.2)        | NCEP<br>ATP III | Multidisciplinary team<br>(Nurse, exercise<br>experts), community<br>volunteers<br><br>Community | 6 | Community-based physical activity program including providing of exercise environments, exercise skills and volunteers' reminding.<br><br><i>Control: Provided environment and skills.</i>                                                                                                                                                                     | Greater improvement in HDL-C, body weight, BMI, WC, BP and FBG in intervention group.                                                                                                                    |
| 7 | Mahadzir et al.<br>[28,29]<br><br>Malaysia<br>Pre-post | 48 adults                                                                                                | Md=46<br>(IQR=11)          | Harmoniz<br>ed  | Nutritionist, peer<br>educators<br><br>Community                                                 | 3 | An evidence-based and community-specific nutrition and lifestyle behaviour peer support program.<br><br>Theory: Health Belief Model                                                                                                                                                                                                                            | Overall increases in carbohydrate intake, glycaemic load, physical activity, duration of sleeping, and reductions in total energy and fat.<br><br>Marginal improvements in WC, HDL-C, FBG, BMI, TG, SBP. |

M=Mean; SD = Standard deviation; Md = median; IQR = interquartile range; MetS = metabolic syndrome; BMI = body mass index; WC = waist circumference; TG = triglyceride; HDL-C = high density lipoprotein cholesterol; FBG = fasting blood glucose; SBP = systolic blood pressure; DBP = diastolic blood pressure
