# Supplementary material for: Group-Based Lifestyle Intervention Strategies for Metabolic Syndrome: A Scoping Review and Strategic Framework for Future Research
Source: MDPI journal article supplement (doi:10.3390/medicina57111169), 2021-10-28
Supplement: s1 [file s1]

**Table S1.** Sample search strategy in OVID Medline.

| #  | Searches                                                   | Results |
|----|------------------------------------------------------------|---------|
| 1  | exp Peer Group/ or peer support.mp. or exp Social Support/ | 93982   |
| 2  | peer.mp.                                                   | 77469   |
| 3  | support group.mp. or exp Self-Help Groups/                 | 12310   |
| 4  | support program.mp.                                        | 1387    |
| 5  | 1 or 2 or 3 or 4                                           | 156163  |
| 6  | intervention.mp.                                           | 548469  |
| 7  | metabolic syndrome.mp. or exp Metabolic Syndrome/          | 50376   |
| 8  | syndrome x.mp.                                             | 1885    |
| 9  | metabolic syndrome x.mp.                                   | 340     |
| 10 | insulin resistance syndrome.mp.                            | 1591    |
| 11 | 7 or 8 or 9 or 10                                          | 52839   |
| 12 | 5 and 6 and 11                                             | 40      |
| 13 | limit 12 to yr="1902-2020"                                 | 40      |
