# Supplementary material for: Group-Based Lifestyle Intervention Strategies for Metabolic Syndrome: A Scoping Review and Strategic Framework for Future Research
Source: MDPI journal article supplement (doi:10.3390/medicina57111169), 2021-10-28
Supplement: s1 [file s1]

**Table S4.** Outcomes reported by the included studies (N = 13).

|                       |                                   | At risk for MetS |       | MetS     |       | Reference                 |
|-----------------------|-----------------------------------|------------------|-------|----------|-------|---------------------------|
|                       |                                   | Improved         | Total | Improved | Total |                           |
| Nutrition             | Energy                            |                  |       | 2        | 3     | [16, 19, 20, 27, 28]      |
|                       | Alcohol energy                    |                  |       | 0        | 1     | [19, 20]                  |
|                       | Fat                               |                  |       | 2        | 3     | [16, 19, 20, 27, 28]      |
|                       | Saturated fat                     |                  |       | 1        | 2     | [16, 19, 20]              |
|                       | PUFA                              |                  |       | 1        | 2     | [16, 19, 20]              |
|                       | MUFA                              |                  |       | 0        | 1     | [19, 20]                  |
|                       | Carbohydrate                      |                  |       | 1        | 3     | [16, 19, 20, 27, 28]      |
|                       | Protein                           |                  |       | 1        | 3     | [16, 19, 20, 27, 28]      |
|                       | Fibre                             |                  |       | 2        | 3     | [16, 19, 20, 27, 28]      |
|                       | Sugar                             |                  |       | 0        | 2     | [19, 20, 27, 28]          |
|                       | Cholesterol                       |                  |       | 0        | 1     | [19, 20]                  |
|                       | Sodium                            |                  |       | 0        | 1     | [19, 20]                  |
|                       | Glycaemic load                    |                  |       | 1        | 2     | [19, 20, 27, 28]          |
|                       | Glycaemic index                   |                  |       | 1        | 1     | [19, 20]                  |
|                       | Number of meals/day               |                  |       | 1        | 1     | [27, 28]                  |
|                       | Slower eating pace                |                  |       | 1        | 1     | [27, 28]                  |
|                       | Late-night eating                 |                  |       | 1        | 1     | [27, 28]                  |
|                       | Breakfast skipping                |                  |       | 1        | 1     | [27, 28]                  |
|                       | Reduction in dining out frequency |                  |       | 0        | 1     | [27, 28]                  |
|                       | Reduction in supplement intake    |                  |       | 1        | 1     | [27, 28]                  |
|                       | Vegetables                        | 0                | 1     |          |       | [29]                      |
|                       | Fruits                            | 1                | 1     |          |       | [29]                      |
|                       | Meat                              | 0                | 1     |          |       | [29]                      |
|                       | Bread                             | 1                | 1     |          |       | [29]                      |
|                       | Dairy                             | 1                | 1     |          |       | [29]                      |
|                       | Diet soda                         | 0                | 1     |          |       | [29]                      |
|                       | Regular soda                      | 0                | 1     |          |       | [29]                      |
|                       | >=5 glasses of water/day          | 1                | 1     |          |       | [29]                      |
|                       | Diet readiness                    | 1                | 1     |          |       | [31, 32]                  |
|                       | FFQ score                         | 0                | 1     |          |       | [33]                      |
| Physical activity     | Energy expenditure                |                  |       | 0        | 1     | [19, 20]                  |
|                       | Being active                      |                  |       | 1        | 1     | [27, 28]                  |
|                       | Physical working capacity at 75%  |                  |       | 1        | 1     | [19, 20]                  |
|                       | Grip                              |                  |       | 1        | 1     | [19, 20]                  |
|                       | Mets-equivalent                   | 0                | 1     | 1        | 1     | [16, 33]                  |
|                       | Frequency                         | 1                | 1     |          |       | [29]                      |
|                       | Duration                          | 1                | 1     |          |       | [29]                      |
|                       | Functional reach                  | 1                | 1     |          |       | [31, 32]                  |
|                       | Sit to stand                      | 1                | 1     |          |       | [31, 32]                  |
|                       | Half sit up                       | 1                | 1     |          |       | [31, 32]                  |
|                       | 6MWT                              | 0                | 1     |          |       | [31, 32]                  |
|                       | Right leg balance                 | 0                | 1     |          |       | [31, 32]                  |
|                       | Left leg balance                  | 0                | 1     |          |       | [31, 32]                  |
|                       | Vertical leap                     | 0                | 1     |          |       | [31, 32]                  |
|                       | Exercise readiness                | 1                | 1     |          |       | [31, 32]                  |
| Anthropometry measure | Weight                            | 3                | 4     | 4        | 6     | [16-23, 25, 26, 29-32]    |
|                       | Waist circumference               | 4                | 5     | 7        | 7     | [16-23, 25-33]            |
|                       | Hip circumference                 | 1                | 1     |          |       | [25]                      |
|                       | Waist-hip ratio                   | 1                | 1     | 0        | 1     | [19, 20, 25]              |
|                       | Body mass index                   | 2                | 4     | 5        | 7     | [16-23, 25, 26-29, 31-33] |
|                       | Body fat mass                     |                  |       | 1        | 1     | [19, 20]                  |

|                         |                                               |   |   |   |   |                        |
|-------------------------|-----------------------------------------------|---|---|---|---|------------------------|
|                         | Body fat %                                    |   |   | 0 | 2 | [19, 20, 27, 28]       |
|                         | Lean                                          |   |   | 1 | 1 | [19, 20]               |
|                         | Abdominal fat                                 |   |   | 1 | 1 | [19, 20]               |
|                         | Visceral fat area                             | 1 | 1 |   |   | [24]                   |
| Cardiovascular measures | Systolic blood pressure                       | 4 | 5 | 3 | 6 | [16-25, 27, 28, 30-33] |
|                         | Diastolic blood pressure                      | 2 | 4 | 4 | 6 | [16-25, 27, 28, 30-33] |
|                         | MAP                                           |   |   | 1 | 1 | [19, 20]               |
|                         | Large AC                                      |   |   | 0 | 1 | [19, 20]               |
|                         | Small AC                                      |   |   | 0 | 1 | [19, 20]               |
| Biomarkers              | Fasting blood glucose                         | 2 | 3 | 4 | 6 | [16-25, 27, 28, 30]    |
|                         | Total cholesterol                             | 1 | 2 | 2 | 4 | [16-22, 24, 25]        |
|                         | HDL-cholesterol                               | 1 | 2 | 3 | 6 | [16-25, 27, 28]        |
|                         | LDL-cholesterol                               | 2 | 2 | 2 | 3 | [17-22, 24, 25]        |
|                         | Triglyceride                                  | 0 | 2 | 2 | 6 | [16-25, 27, 28]        |
|                         | Fasting insulin                               | 0 | 1 | 0 | 2 | [16, 19, 20, 24]       |
|                         | HOMA-IR                                       | 1 | 1 | 0 | 2 | [16, 19, 20, 24]       |
|                         | HOMA-b                                        | 1 | 1 |   |   | [24]                   |
|                         | c-Reactive protein                            | 1 | 1 | 1 | 2 | [16, 21, 22, 24]       |
|                         | Uric acid                                     |   |   | 1 | 1 | [16]                   |
|                         | TG: HDL ratio                                 |   |   | 1 | 1 | [17, 18]               |
|                         | HbA1c                                         | 2 | 2 |   |   | [24, 25]               |
|                         | Hepatic insulin resistance index              | 1 | 1 |   |   | [24]                   |
| MetS components         | Proportion of MetS                            | 1 | 1 | 1 | 1 | [16, 25]               |
|                         | Central obesity/ elevated waist circumference | 1 | 1 | 1 | 1 | [16, 25]               |
|                         | Hypertension /elevated blood pressure         | 1 | 1 | 0 | 1 | [16, 25]               |
|                         | Hyperglycaemia                                | 0 | 1 | 1 | 1 | [16, 25]               |
|                         | Low HDL-cholesterol                           | 1 | 1 | 0 | 1 | [16, 25]               |
|                         | Hypertriglyceridemia                          | 1 | 1 | 1 | 1 | [16, 25]               |
|                         | Number of MetS components                     | 1 | 1 |   |   | [24]                   |
| Other outcomes          | Longer sleeping duration                      |   |   | 1 | 1 | [27, 28]               |
|                         | Smoking                                       |   |   | 1 | 1 | [27, 28]               |
|                         | Smoking readiness                             | 0 | 1 |   |   | [31, 32]               |
|                         | Diabetes readiness                            | 0 | 1 |   |   | [31, 32]               |
|                         | Stress                                        | 0 | 1 |   |   | [33]                   |
|                         | Literacy / knowledge                          | 2 | 2 | 1 | 1 | [26, 30, 33]           |
|                         | Perception of MetS                            | 0 | 1 |   |   | [33]                   |
|                         | Life satisfaction                             | 0 | 1 |   |   | [29]                   |
|                         | SF12 score                                    | 0 | 1 |   |   | [31, 32]               |
